# Supplementary material for: NRF2 activation by cysteine as a survival mechanism for triple-negative breast cancer cells
Source: Springer Nature journal article supplement (doi:10.1038/s41388-024-03025-0), 2024-04-10
Supplement: MOESM7 [file 41388_2024_3025_MOESM7_ESM.pdf]

## NRF2 activation by cysteine as a survival mechanism for triple-negative breast cancer cells

Laura Bottoni, Alberto Minetti, Giulia Realini, Elena Pio, Daniela Giustarini, Ranieri Rossi, Chiara Rocchio, Lorenzo Franci, Laura Salvini, Orazio Catona, Romina D'Aurizio, Mahdi Rasa, Emanuele Giurisato, Francesco Neri, Maurizio Orlandini, Mario Chiariello, Federico Galvagni

### Supplementary material

Supplementary figures: Figures S1-S8

Supplementary Tables: Tables S1-S4

Supplementary methods

### Supplementary figures

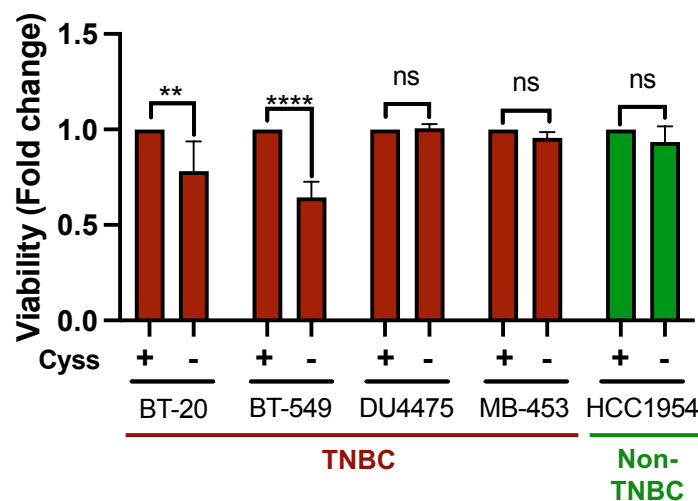

**Fig. S1.** Cell survival of the indicated TNBC and non-TNBC cell lines was measured after 24 h of Cys deprivation using a cell viability assay. Viability values were calculated for each cell line as fold change relative to cells growing in complete medium.  $\pm$  Cys conditions were compared using the two-tailed unpaired t-test. An F test was used to compare variance.

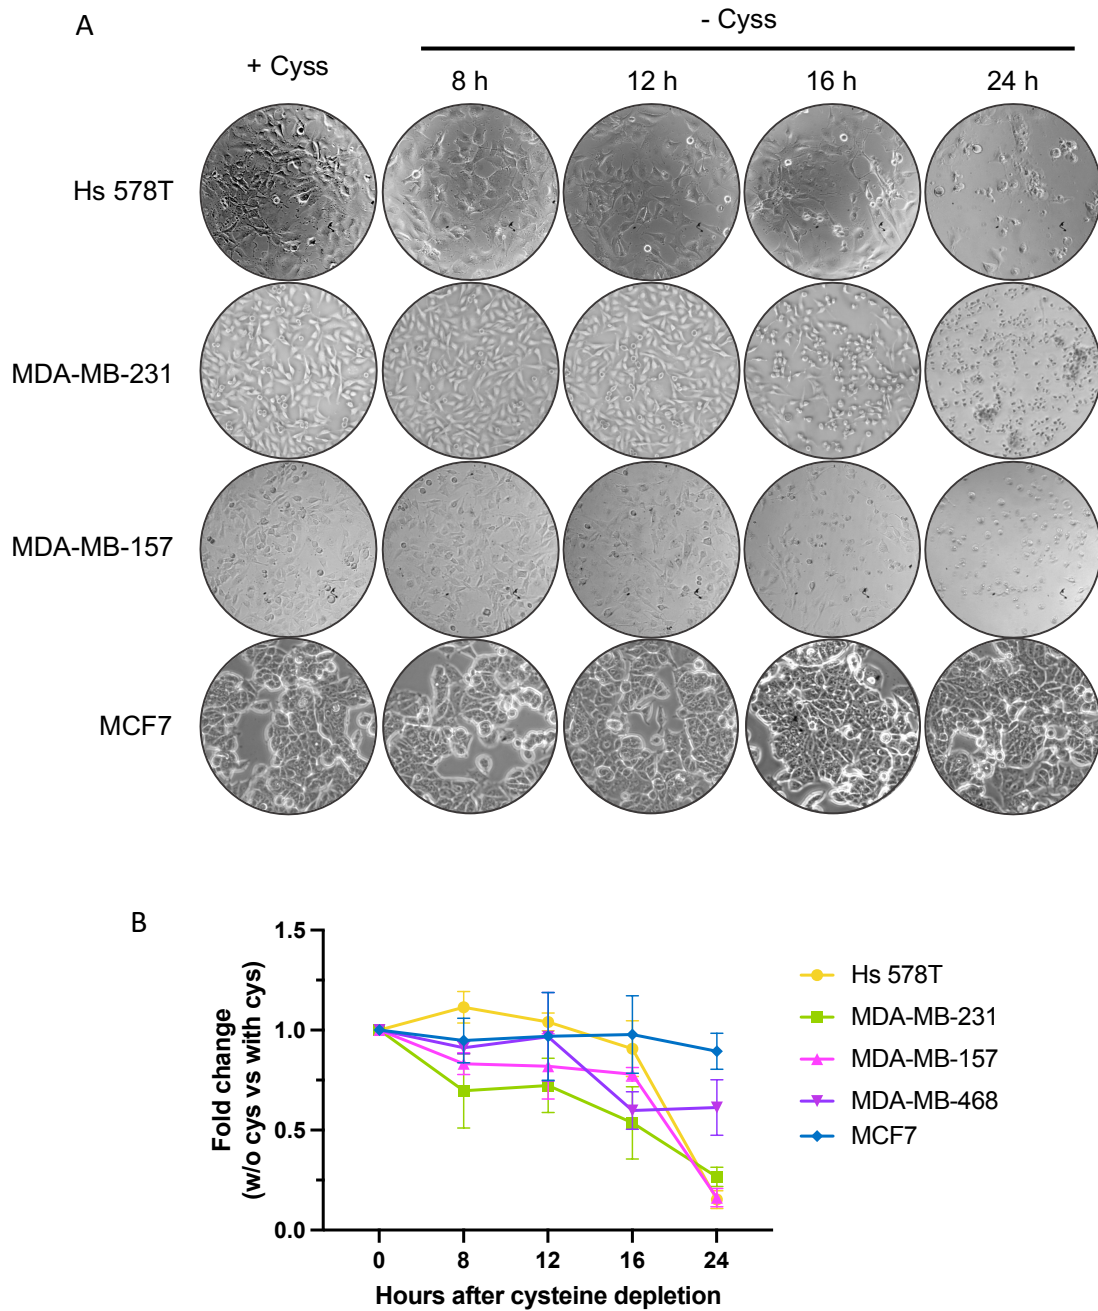

**Fig. S2. A** Bright-field microscopy images of TNBC (Hs 578T, MDA-MB-231, MDA-MB-157, and MDA-MB-468) and non-TNBC (MCF7) cell lines. **B** Cell survival of the indicated TNBC and non-TNBC (MCF7) cell lines was measured at the indicated time points following Cyss deprivation using a cell viability assay. Viability values were calculated for each cell line as fold change relative to cells growing in complete medium.

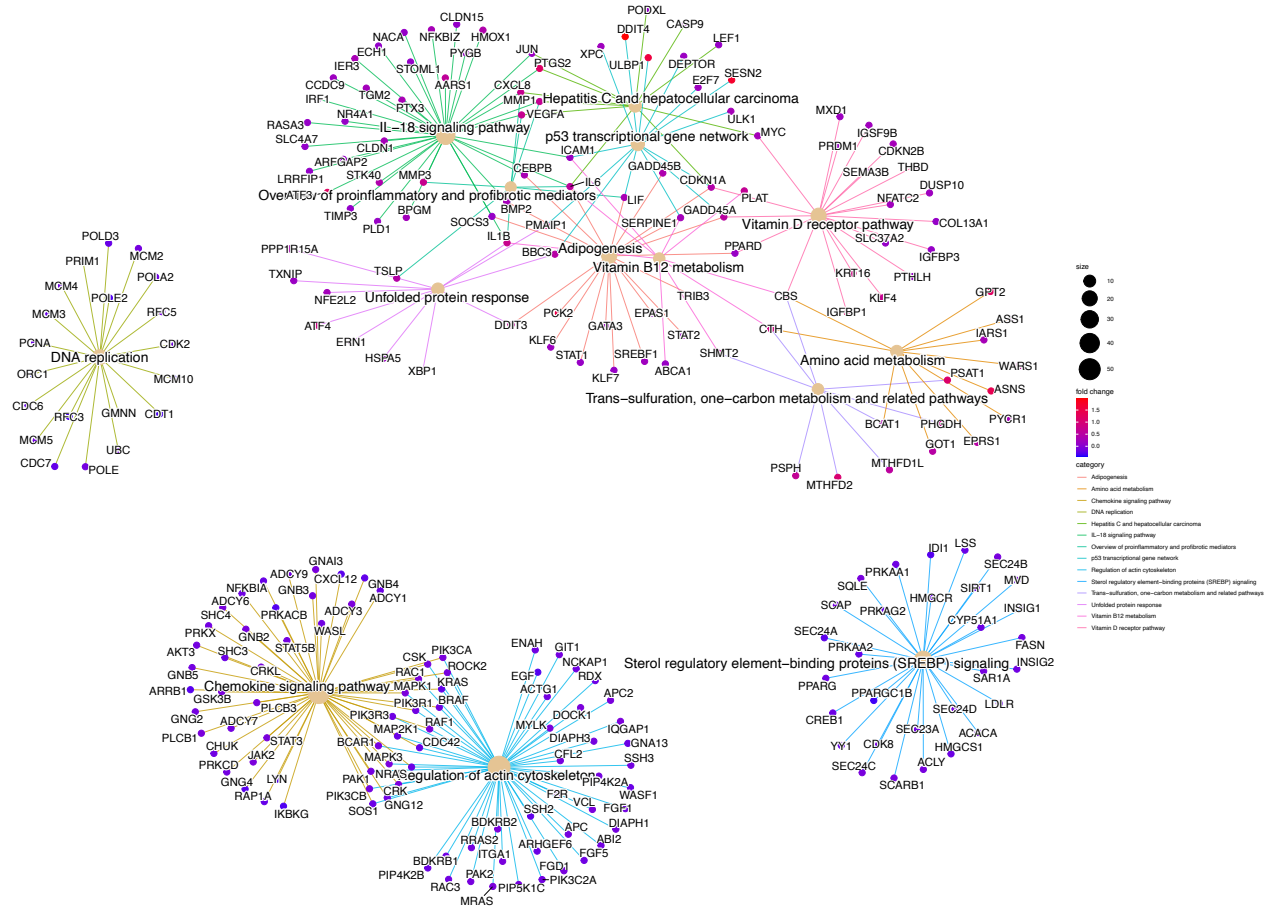

**Fig. S3.** Network plot depicting the linkages of genes and modulated pathways (see Fig. 2C, except those shown in Fig. 2D) that emerged after Cyss depletion.

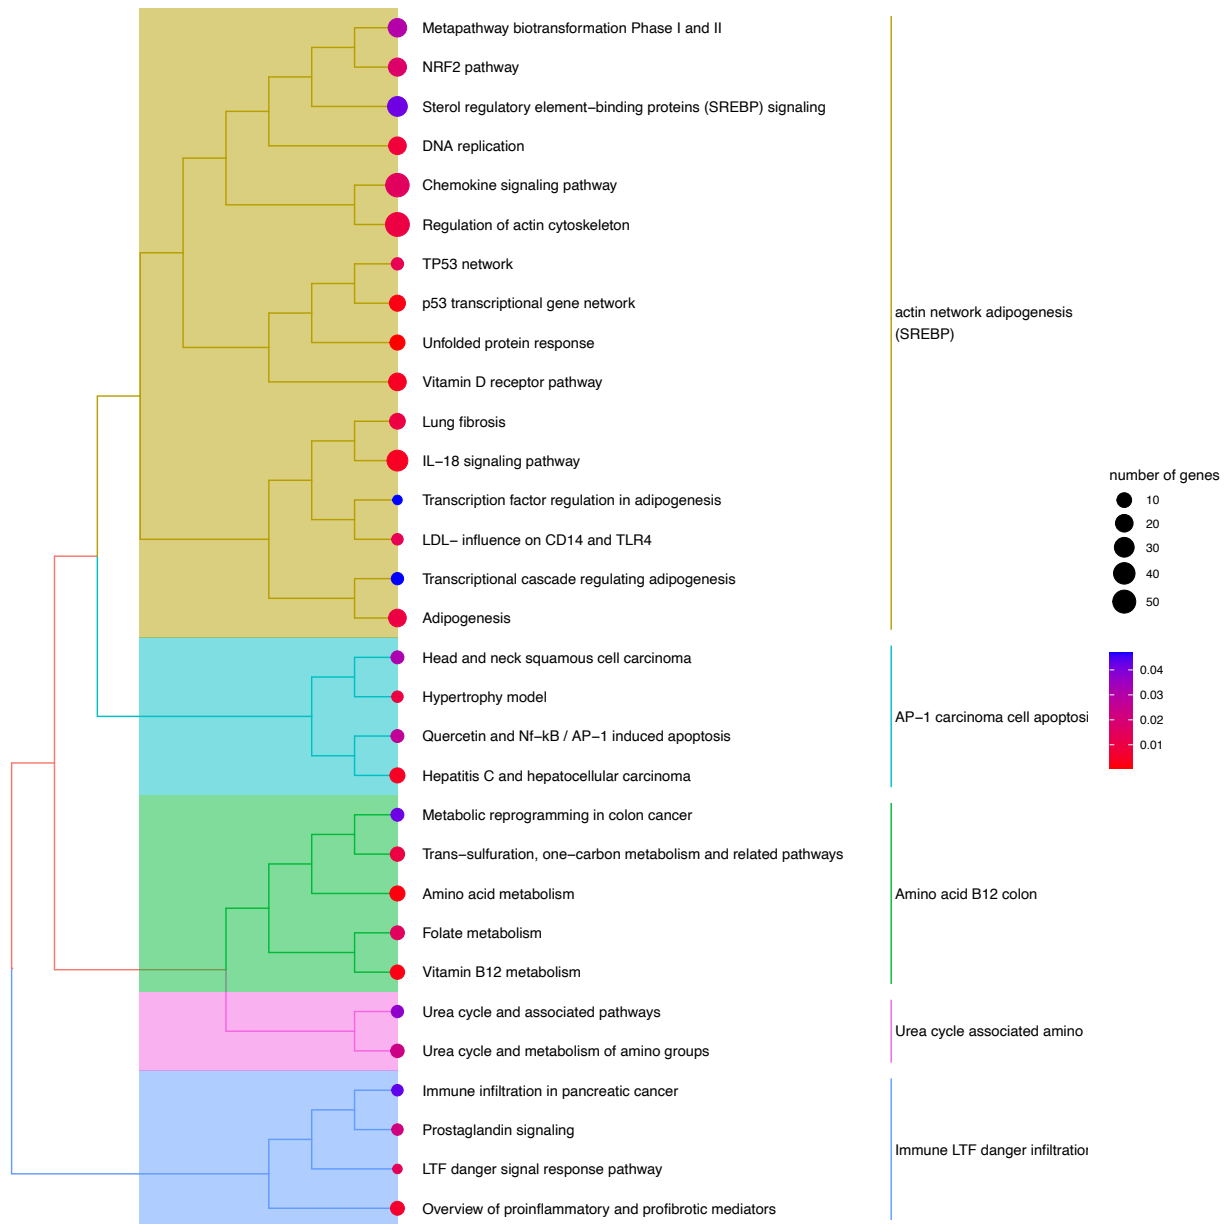

**Fig. S4.** Hierarchical clustering of modulated pathways based on the pairwise Jaccard similarity index, using Ward.D as the agglomeration method of average similarities between groups.

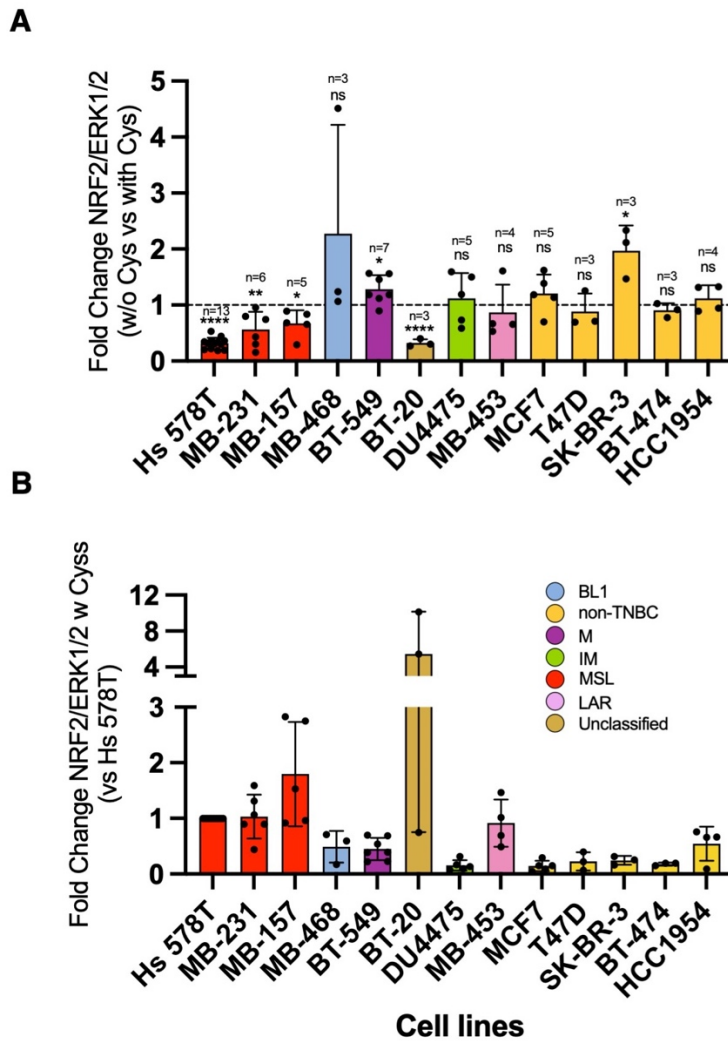

**Fig. S5. Free Cys induce NRF2 expression and activity in TNBC cell lines of the mesenchymal stem-like subtype.** Representation of the NRF2 expression values in Fig. 3B as bar charts. p values (w/o Cys vs with Cys) and the number of independent experiments are indicated at the top of the columns. Values are expressed as mean  $\pm$  SD. \*:  $p \leq 0.05$ ; \*\*:  $p \leq 0.01$ ; \*\*\*:  $p \leq 0.001$ ; \*\*\*\*:  $p \leq 0.0001$ .  $\pm$  Cys conditions were compared using the two-tailed unpaired t-test. An F test was used to compare variance.

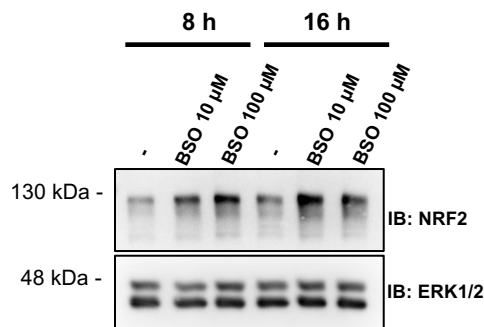

**Fig. S6: In Hs 578T cells, NRF2 expression is not downregulated by interruption of biosynthetic GSH pathway.** Hs 578T cells were treated with the indicated concentrations of BSO for 8 or 16 h,

and NRF2 level was analyzed by Western blot. Analysis of total ERK1/2 expression was used as loading control.

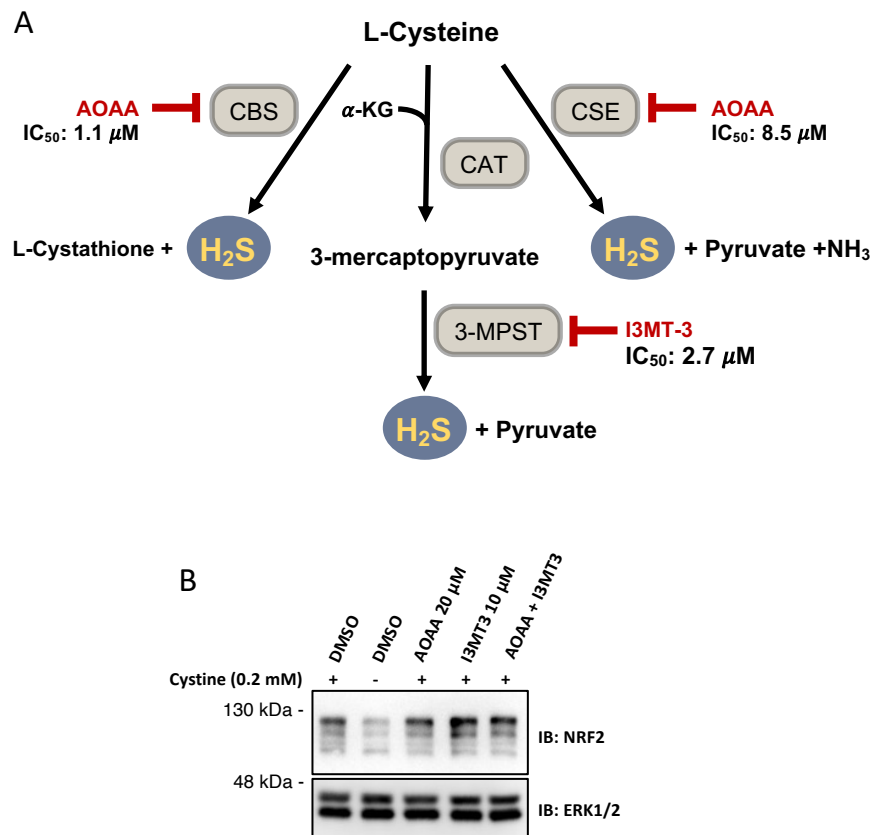

**Fig. S7: In breast cancer cells, Cyss-dependent NRF2 stabilization is not dependent on intracellular H<sub>2</sub>S.** **A** Schematic representation of H<sub>2</sub>S formation from cysteine in mammalian cells and the inhibitors used. CBS: cystathionine-β-synthase; CSE: cystathionine-γ-lyase, CAT: cysteine aminotransferase, 3-MPST: 3-mercaptopyruvate sulfurtransferase, α- KG: α-ketoglutarate, AOAA: aminoxyacetic acid. **B** Hs 578T cells were treated with pharmacological inhibitors of endogenous H<sub>2</sub>S-producing enzymes AOAA (36) and I3MT-3 (37) for 16 h, and NRF2 level was analyzed by Western blot. As a control, an 8-hour incubation in growth media without cystine was performed. Analysis of total ERK1/2 expression was used as loading control.

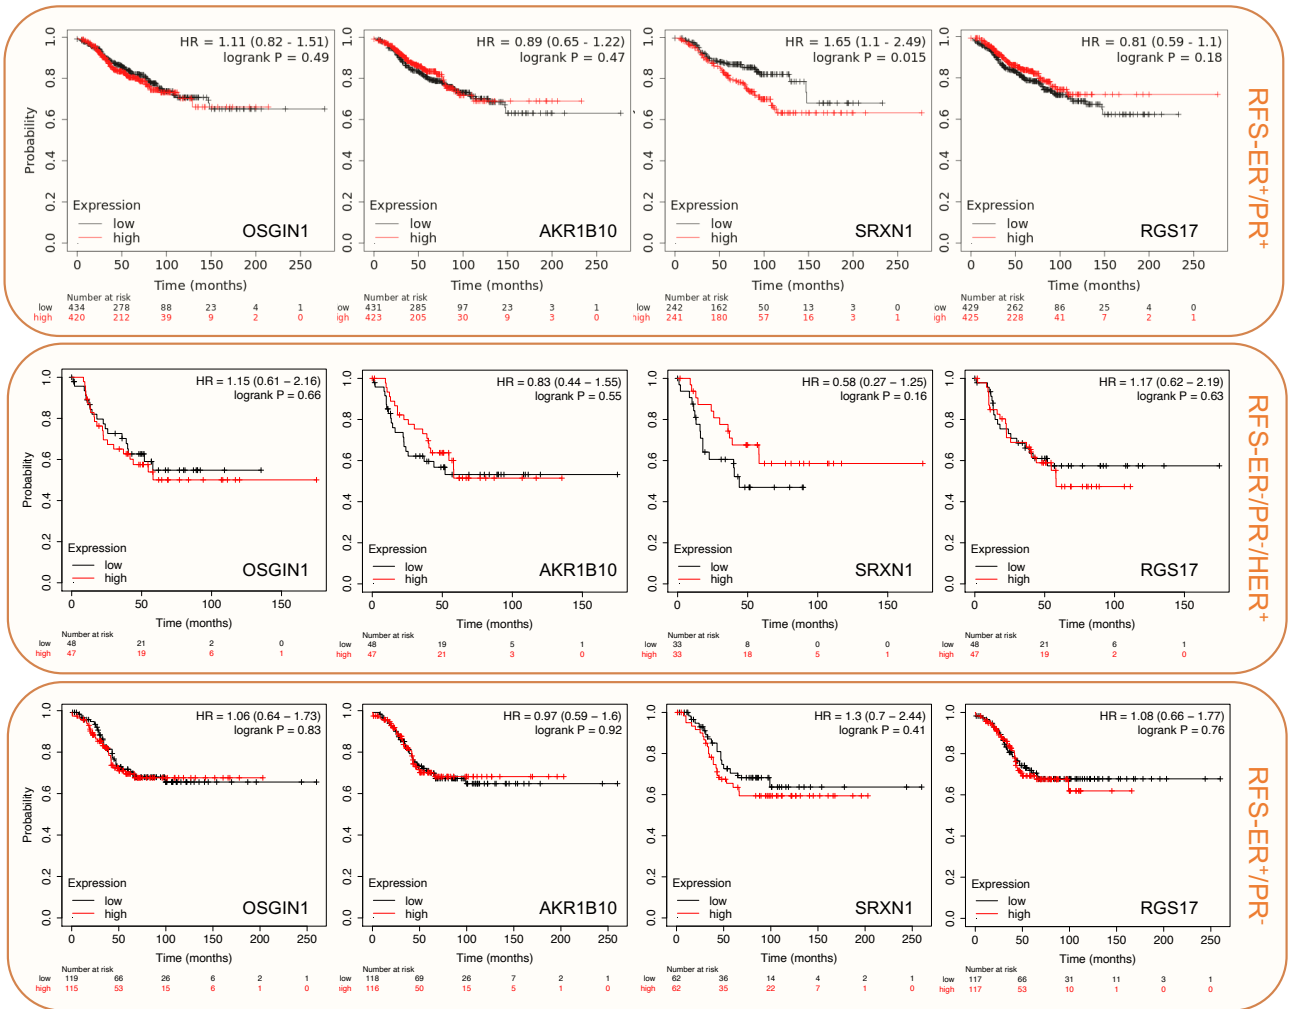

**Fig. S8.** Kaplan-Meier plots of the indicated genes for non-TNBC patients.

## Supplementary tables

**Tab. S1: List of cysteinylated sites identified in KEAP1 incubated with.** The first column shows the peptide sequence where cysteinylated was found. The specific cysteinylated amino acid residues are reported in the column “Site”. “Delta (ppm)” displays the mass difference between the theoretical mass of the peptide and the experimental measured mass (reported in column “Mono Mass Exp”). “RT” shows the retention time range with the most abundant MS area.

| Peptide Sequence                | Site       | Delta (ppm) | RT   | Mono Mass Exp. |
|---------------------------------|------------|-------------|------|----------------|
| CEILQSDSR                       | C288       | 3,01        | 4,0  | 1168,4888      |
| CEILQSDSR                       | C288       | 2,17        | 4,0  | 1168,4878      |
| LNSAECYPER                      | C489       | 2,42        | 13,9 | 1462,5892      |
| LNSAECYPER                      | C489, A487 | 0,55        | 14,5 | 1494,5586      |
| SGVGVAVTMEPCR                   | C613       | -0,04       | 16,5 | 1423,6257      |
| LSQQLCDVTLQVK                   | C77        | 1,58        | 19,1 | 1592,7927      |
| LSQQLCDVTLQVK                   | C77        | 1,58        | 19,1 | 1592,7927      |
| IFEELTLHKPTQVMPCR               | C319       | 1,80        | 19,8 | 2160,0569      |
| CVLHVMNGAVMYQIDSVVR             | C151       | 1,39        | 24,6 | 2252,0605      |
| CVLHVMNGAVMYQIDSVVR             | C151       | 1,82        | 24,6 | 2252,0615      |
| QEEFFNLSHCQLVTLISR              | C226       | -0,47       | 26,1 | 2282,0813      |
| QEEFFNLSHCQLVTLISR              | C226       | -0,47       | 26,1 | 2282,0813      |
| IYVLGGYDGHTFLDSVECYDPD TDWSEVTR | C583       | 1,78        | 29,6 | 3671,5774      |
| IYVLGGYDGHTFLDSVECYDPD TDWSEVTR | C583       | 1,65        | 29,6 | 3671,5769      |
| QEEFFNLSHCQLVTLISR              | C226       | -0,47       | 30,2 | 2297,0630      |

**Tab. S2: Cell lines used in the study.** HCC1954 were purchased from ATCC (Rockefeller, MD, USA), BT474, MDA-MB-453 all the other TNBC cell lines were kindly provided by Prof. S. Pece, IEO, Milan. All the cell lines were tested for mycoplasma contamination by using MycoAlert Mycoplasma Detection Kit (Lonza, Basel, Switzerland).

| Cell line       | TNBC subtype                    | Breast cancer subtype | Molecular subtype                                        | Medium                                                                       |
|-----------------|---------------------------------|-----------------------|----------------------------------------------------------|------------------------------------------------------------------------------|
| <b>TNBC</b>     |                                 |                       |                                                          |                                                                              |
| BT-20           | Unclassified                    | Basal A               | Basal                                                    | MEM + 0.1mM NEAA + 1mM NaPyr + 10% FBS + 2mM L-Glut                          |
| MDA-MB-468      | Basal-like 1 (BL1)              | Basal A               | Basal                                                    | RPMI 1640 + 10% FBS + 2mM L-Glut                                             |
| DU4475          | Immunomodulatory (IM)           | Basal A               | Basal                                                    | RPMI 1640 + 20% FBS + 2mM L-Glut + 1mM NaPyr +10mM HEPES + 2.5 g/L D-Glucose |
| MDA-MB-157      | Mesenchymal stem-like (MSL)     | Basal B               | Claudin low                                              | DMEM/F12 + 10%FBS + 2mM L-Glu                                                |
| MDA-MB-231      | Mesenchymal stem-like (MSL)     | Basal B               | Claudin low                                              | DMEM + 10%FBS + 2mM L-Glu                                                    |
| BT-549          | Mesenchymal-like (M)            | Basal B               | Claudin low                                              | RPMI 1640 + 10% FBS + 2mM L-Glut + 0.023U/ml human insulin                   |
| Hs 578T         | Mesenchymal stem-like (MSL)     | Basal B               | Claudin low                                              | DMEM + 10%FBS + 2mM L-Glu + 0.01 mg/ml human insulin                         |
| MDA-MB-453      | Luminal Androgen Receptor (LAR) | Luminal               | Luminal AR                                               | DMEM + 10%FBS + 2mM L-Glu                                                    |
| <b>non-TNBC</b> |                                 |                       |                                                          |                                                                              |
| HCC1954         |                                 | HER2 positive         | Basal A Her <sup>+</sup> ER <sup>-</sup> PR <sup>-</sup> |                                                                              |
| BT-474          |                                 | Luminal B             | luminal Her <sup>+</sup> ER <sup>+</sup> PR <sup>+</sup> | DMEM/F12 + 10% FCS + 2mM L-Glu                                               |
| MCF7            |                                 | Luminal A             | luminal Her <sup>+</sup> ER <sup>+</sup> PR <sup>+</sup> | RPMI 1640 + 10% FBS + 2mM L-Glut + 0.01 mg/ml human insulin                  |
| SK-BR3          |                                 | HER2 positive         | luminal Her <sup>+</sup> ER <sup>-</sup> PR <sup>-</sup> | DMEM + 10%FBS + 2mM L-Glu                                                    |
| T-47D           |                                 | Luminal A             | luminal Her <sup>+</sup> ER <sup>+</sup> PR <sup>+</sup> | DMEM + 10%FBS + 2mM L-Glu                                                    |



**Tab. S3: Primers for RT-qPCR used in the study.**

| Gene           |     | 5'-3' oligonucleotide sequence |
|----------------|-----|--------------------------------|
| <i>GCLM</i>    | For | GGAACCTGCTGAACTGGGG            |
| <i>GCLM</i>    | Rev | CCCTGACCAAATCTGGGTTGA          |
| <i>GSR</i>     | For | GCCTTCACGAGTGATCCCAA           |
| <i>GSR</i>     | Rev | CTGCACCAACAATGACGCTG           |
| <i>NQO1</i>    | For | CGCAGACCTTGTGATATTCCAG         |
| <i>NQO1</i>    | Rev | CGTTTCTTCCATCCTTCCAGG          |
| <i>MGST1</i>   | For | TCGTGACAAAGCAAATTGTCTGG        |
| <i>MGST1</i>   | Rev | CCATTACCTGGGTGAGGTCAA          |
| <i>OSGIN1</i>  | For | CTCCAGAAAGGACCACCTCG           |
| <i>OSGIN1</i>  | Rev | TAGGGTGTGTAGCCGGAGAG           |
| <i>AKR1B10</i> | For | AAACTGGAGGGCCTGTAACG           |
| <i>AKR1B10</i> | Rev | ACAGCACCTCGATTCTCGTC           |

**Tab. S4: Antibodies used in the study.**

| Antigen           | Antibody                                                      | Host/clonality    | Cat #                                  |
|-------------------|---------------------------------------------------------------|-------------------|----------------------------------------|
| <b>NRF2</b>       | NRF2                                                          | Rabbit polyclonal | #16396-1-AP – ProteinTech              |
| <b>SLC7A11</b>    | SLC7A11 Antibody (711589)                                     | Rabbit polyclonal | # 711589 Thermo Fisher Scientific      |
| <b>KEAP1</b>      | KEAP1 (OTI1B4-formerly 1B4)                                   | Mouse monoclonal  | #TA502059 – Origene                    |
| <b>NQO1</b>       | NQO1 antibody (A180)                                          | Mouse monoclonal  | #sc-32793 – Santa Cruz Biotechnology   |
| <b>ERK1/2</b>     | p44/42 MAPK (Erk 1/2)                                         | Rabbit polyclonal | #9102S – Cell Signaling                |
| <b>β-ACTIN</b>    | Anti-β-actin (AC-15)                                          | Mouse monoclonal  | #A5441 – Sigma-Aldrich                 |
| <b>IgG RABBIT</b> | Peroxidase-conjugated AffinityPure Goat Anti-Rabbit IgG (H+L) | Goat polyclonal   | #111-035-003 – Jackson Immuno Research |
| <b>IgG MOUSE</b>  | Peroxidase-conjugated AffinityPure Goat Anti-Mouse IgG (H+L)  | Goat polyclonal   | #115-035-003 – Jackson Immuno Research |

## Supplementary methods.

### Plasmid construction

Lentiviral plasmid for NRF2-ΔN89 expression was obtained by amplifying human NRF2 ORF from codon 90 (Q) to the STOP codon with the following oligonucleotides: 5'-GAGAGGATCCACCATGCAGCACATCCAGTCAGAA-3' and 5'-GAGAGTCGACCTAGTTTTTCTTAACATCTGGC-3'. Lentiviral plasmids for Myc-DDK-tagged

AKR1B10 (NM\_020299) and SRXN1 (NM\_080725) expression were obtained by PCR amplification of the human ORFs from plasmid RC203177 and RC207654 (ORIGENE, Rockville, MD, USA), respectively, with the following oligonucleotides: 5'-GGAATTCGTCGACTGGATC-3' and 5'-GAGAGTCGACGTTAAACCTTATCGTCG-3'. Lentiviral plasmid for OSGIN1 expression was obtained by PCR amplification of the human ORF (NM\_182981) with the following oligonucleotides: 5'-GAGAAGATCTCCACCATGAGCTCCTCCAGAAAGG-3' and 5'-GAGAGTCGACTTAGGGTGGCTTCCTGGTC-3'. Lentiviral plasmid for DDK-tagged RGS17 (NM\_012419.5) expression was obtained by PCR amplification of the human ORFs by nested RT-PCR from Hs 578T RNA with the following oligonucleotides: 5'-CACAGTAGCCTGAGGAATGC-3', 5'-GAGAAGATCTACCATGCGAAAAAGGCAGCAGTC-3' and 5'-GAGAGTCGACTTACTTGTCGTCATCGTCTTTGTAGTCGCCAGATTCAGAAGAAGAGCCAG-3'. All the amplicons were inserted BamHI-Sall in pCCLsin.hPGK.GFP.pre replacing the GFP ORF. The plasmid pCCLsin.hPGK.GFP.pre was used as negative control expressing GFP in lentiviral transduction experiments.
